# Supplementary material
Source: PubMed Central journal article supplement (PMC5637601)
Supplement: tpmd170119.SD1.pdf [file tpmd170119.SD1.pdf]

SUPPLEMENTAL INFORMATION

Over a 2-week period in June 2012 at the end of the dry season, blood samples (thick/thin blood films and dried blood spot) and malaria related questionnaires were collected after obtaining informed consent from 698 participants between the ages of 1–85 years during this cross-sectional survey (Supplemental Table 1). From this survey, 267 (38.3%) participants were microscopy positive for any *Plasmodium* spp. with most being infected with *P. falciparum* (97.4%, *N* = 260), a few infected with mixed *P. falciparum*/*P. malariae* infections (1.9%, *N* = 5), and 0.7% (*N* = 2) with *P. malariae* infections (Supplemental Table 1). All the participants with *P. malariae* infections (*N* = 2) by microscopy were confirmed to be harboring *P. falciparum* infections by *m*sp2 PCR and are included in the analyses as mixed *P. falciparum*/*P. malariae* infections. Supplemental Table 1 summarizes the parasitological

characteristics of the total cross-sectional study population by participants' age group, gender and catchment area. *P. falciparum* infections occurred across all age groups in both catchment areas with the highest prevalence of *P. falciparum* infection occurring among children between 6–10 years of age, with 58.1% (95% CI: 54.1–62.1%) of 6–10 year olds across both catchment areas having a *P. falciparum* infection (Supplemental Table 1). When male participants were compared with females there were no differences in the prevalence *P. falciparum* infection for the total study population and within/between the catchment areas. From this cross-sectional survey on the reservoir of *P. falciparum* infections in BD, 200 participants with confirmed *P. falciparum* infections (including mixed *P. falciparum*/*P. malariae* infections) were selected for the microsatellite analyses.

SUPPLEMENTAL TABLE 1  
Demographics and parasitological characteristics of the study population collected at the end of the dry season in June 2012

| Characteristic                                                        | Total           | Veal/Gowrie     | Soe             |
|-----------------------------------------------------------------------|-----------------|-----------------|-----------------|
| <b>Age groups*</b>                                                    |                 |                 |                 |
| All                                                                   | 698             | 354 (50.7)      | 344 (49.3)      |
| 1–5 years                                                             | 133 (19.1)      | 76 (21.5)       | 57 (16.6)       |
| 6–10 years                                                            | 155 (22.2)      | 79 (22.3)       | 76 (22.1)       |
| 11–20 years                                                           | 140 (20.1)      | 73 (20.6)       | 67 (19.5)       |
| 21–39 years                                                           | 112 (16.0)      | 49 (13.8)       | 63 (18.3)       |
| ≥ 40 years                                                            | 158 (22.6)      | 77 (21.8)       | 81 (23.5)       |
| <b>Gender*</b>                                                        |                 |                 |                 |
| Female                                                                | 355 (50.9)      | 182 (51.4)      | 173 (50.3)      |
| Male                                                                  | 343 (49.1)      | 172 (48.6)      | 171 (49.7)      |
| <b>Microscopic <i>Plasmodium</i> spp. prevalence (<i>N</i> = 267)</b> |                 |                 |                 |
| <i>P. falciparum</i>                                                  | 260 (97.4)      | 140 (96.6)      | 120 (98.4)      |
| <i>P. falciparum</i> / <i>P. malariae</i>                             | 5 (1.9)         | 4 (2.7)         | 1 (0.8)         |
| <i>P. malariae</i>                                                    | 2 (0.7)         | 1 (0.7)         | 1 (0.8)         |
| <b><i>Plasmodium</i> spp. median density (<i>N</i> = 267)†</b>        |                 |                 |                 |
| All                                                                   | 280 [120–880]   | 280 [120–800]   | 280 [150–1,000] |
| 1–5 years                                                             | 960 [480–2,200] | 900 [640–1,860] | 960 [440–2,760] |
| 6–10 years                                                            | 240 [120–940]   | 200 [120–700]   | 400 [140–1,240] |
| 11–20 years                                                           | 240 [120–520]   | 240 [120–490]   | 240 [120–660]   |
| 21–39 years                                                           | 180 [110–500]   | 240 [120–470]   | 160 [80–730]    |
| ≥ 40 years                                                            | 120 [80–230]    | 100 [80–280]    | 160 [80–200]    |
| Female                                                                | 290 [120–890]   | 240 [120–800]   | 280 [120–880]   |
| Male                                                                  | 320 [160–880]   | 280 [120–880]   | 360 [160–960]   |
| <b><i>P. falciparum</i> prevalence (<i>N</i> = 267)‡</b>              |                 |                 |                 |
| All                                                                   | 267 (38.3)      | 145 (41.0)      | 122 (35.5)      |
| 1–5 years                                                             | 51 (38.3)       | 28 (36.8)       | 23 (40.4)       |
| 6–10 years                                                            | 90 (58.1)       | 45 (57.0)       | 45 (59.2)       |
| 11–20 years                                                           | 72 (51.4)       | 42 (57.5)       | 30 (44.8)       |
| 21–39 years                                                           | 22 (19.6)       | 10 (20.4)       | 12 (19.0)       |
| ≥ 40 years                                                            | 32 (20.3)       | 20 (26.0)       | 12 (14.8)       |
| Female                                                                | 134 (37.7)      | 71 (39.0)       | 63 (36.4)       |
| Male                                                                  | 133 (38.8)      | 74 (43.0)       | 59 (34.5)       |
| <b><i>P. falciparum</i> median MOI (<i>N</i> = 267)§</b>              |                 |                 |                 |
| All                                                                   | 2 [1–3]         | 2 [1–3]         | 2 [1–3]         |
| 1–5 years                                                             | 2 [1–3]         | 2 [1–3]         | 1.5 [1–3.25]    |
| 6–10 years                                                            | 2 [1–3]         | 2 [1–3]         | 3 [2–4]         |
| 11–20 years                                                           | 2 [1–3]         | 2 [2–3]         | 2 [1–3]         |
| 21–39 years                                                           | 1 [1–2]         | 1 [1–3]         | 1 [1–2]         |
| ≥ 40 years                                                            | 1 [1–2]         | 1 [1–2]         | 1 [1–2]         |

IQR = inter quartile range; MOI = multiplicity of infection; PCR = polymerase chain reaction.

\* Data reflect No. (% (n/N)) of subjects.

† Median parasite density for microscopically positive *P. falciparum* (including mixed *P. falciparum*/*P. malariae* infections) (value/μL, IQR) samples.

‡ Data reflect No. (% (n/N)) of participants sampled that were positive for *P. falciparum* (including mixed *P. falciparum*/*P. malariae* infections) by microscopy and *m*sp2 PCR.

§ Data reflect the median MOI for the participants sampled that were positive for *P. falciparum* (including mixed *P. falciparum*/*P. malariae* infections) by microscopy and *m*sp2 PCR (median, [IQR]).

SUPPLEMENTAL TABLE 2

Allelic size range, number of alleles, expected heterozygosity, and microsatellite loci genotyping success

| Locus         | Chromosome | Range (bp) | A  | $H_e$ | Genotyping success (%) |
|---------------|------------|------------|----|-------|------------------------|
| TA1           | 6          | 151–202    | 17 | 0.89  | 83.0                   |
| TA60          | 13         | 66–99      | 10 | 0.79  | 99.0                   |
| TA40          | 10         | 202–292    | 26 | 0.84  | 97.0                   |
| POLY $\alpha$ | 4          | 125–191    | 20 | 0.88  | 93.5                   |
| ARA2          | 11         | 59–80      | 8  | 0.80  | 98.5                   |
| PfG377        | 12         | 90–105     | 6  | 0.63  | 98.5                   |
| TA109         | 6          | 148–208    | 18 | 0.83  | 99.0                   |
| TA87          | 6          | 75–126     | 16 | 0.86  | 96.5                   |
| TA42          | 5          | 179–233    | 8  | 0.35  | 89.0                   |
| 2490          | 10         | 75–90      | 5  | 0.40  | 91.5                   |
| TA81          | 5          | 103–136    | 11 | 0.84  | 98.0                   |
| PfPK2         | 12         | 153–192    | 14 | 0.83  | 94.5                   |

A = number of alleles per locus;  $H_e$  = expected heterozygosity.

SUPPLEMENTAL TABLE 3

Microsatellite allele frequencies and sample sizes (n) for 12 microsatellite loci

| Marker | bp   | All infections (N = 200) |           | Dominant infections (N = 74) |           |  |
|--------|------|--------------------------|-----------|------------------------------|-----------|--|
|        |      | Frequency                | Frequency | Frequency                    | Frequency |  |
| TA1    | 151  | 0.012                    | 0.016     |                              |           |  |
|        | 154  | 0.006                    | –         |                              |           |  |
|        | 157  | 0.006                    | 0.016     |                              |           |  |
|        | 160  | 0.084                    | 0.082     |                              |           |  |
|        | 163  | 0.145                    | 0.131     |                              |           |  |
|        | 166  | 0.187                    | 0.197     |                              |           |  |
|        | 169  | 0.151                    | 0.098     |                              |           |  |
|        | 172  | 0.133                    | 0.131     |                              |           |  |
|        | 175  | 0.072                    | 0.049     |                              |           |  |
|        | 178  | 0.066                    | 0.082     |                              |           |  |
|        | 181  | 0.036                    | 0.082     |                              |           |  |
|        | 184  | 0.024                    | –         |                              |           |  |
|        | 187  | 0.018                    | 0.016     |                              |           |  |
|        | 190  | 0.018                    | 0.033     |                              |           |  |
|        | 193  | 0.030                    | 0.033     |                              |           |  |
|        | 196  | 0.006                    | 0.016     |                              |           |  |
|        | 202  | 0.006                    | 0.016     |                              |           |  |
| n      |      | 166                      | 61        |                              |           |  |
| TA60   | 66   | 0.020                    | 0.027     |                              |           |  |
|        | 72   | 0.278                    | 0.284     |                              |           |  |
|        | 75   | 0.222                    | 0.230     |                              |           |  |
|        | 78   | 0.030                    | 0.027     |                              |           |  |
|        | 81   | 0.248                    | 0.176     |                              |           |  |
|        | 84   | 0.152                    | 0.162     |                              |           |  |
|        | 87   | 0.030                    | 0.054     |                              |           |  |
|        | 90   | 0.005                    | 0.014     |                              |           |  |
|        | 93   | 0.010                    | 0.014     |                              |           |  |
|        | 99   | 0.005                    | 0.014     |                              |           |  |
|        | n    |                          | 198       | 74                           |           |  |
|        | TA40 | 202                      | 0.010     | –                            |           |  |
| 205    |      | 0.010                    | 0.014     |                              |           |  |
| 208    |      | 0.021                    | 0.028     |                              |           |  |
| 211    |      | 0.010                    | –         |                              |           |  |
| 214    |      | 0.010                    | 0.014     |                              |           |  |
| 217    |      | 0.010                    | 0.014     |                              |           |  |
| 220    |      | 0.067                    | 0.085     |                              |           |  |
| 223    |      | 0.021                    | 0.028     |                              |           |  |
| 226    |      | 0.077                    | 0.113     |                              |           |  |
| 229    |      | 0.005                    | 0.014     |                              |           |  |
| 235    |      | 0.026                    | 0.042     |                              |           |  |
| 238    |      | 0.021                    | 0.028     |                              |           |  |
| 241    |      | 0.253                    | 0.183     |                              |           |  |
| 244    |      | 0.278                    | 0.211     |                              |           |  |
| 247    |      | 0.057                    | 0.085     |                              |           |  |
| 250    |      | 0.010                    | 0.028     |                              |           |  |

(continued)

SUPPLEMENTAL TABLE 3

Continued

| Marker        | bp     | All infections (N = 200) |           | Dominant infections (N = 74) |           |  |
|---------------|--------|--------------------------|-----------|------------------------------|-----------|--|
|               |        | Frequency                | Frequency | Frequency                    | Frequency |  |
| POLY $\alpha$ | 253    | 0.026                    | 0.014     |                              |           |  |
|               | 256    | 0.016                    | 0.028     |                              |           |  |
|               | 259    | 0.005                    | –         |                              |           |  |
|               | 262    | 0.005                    | 0.014     |                              |           |  |
|               | 265    | 0.005                    | 0.014     |                              |           |  |
|               | 274    | 0.005                    | 0.014     |                              |           |  |
|               | 283    | 0.005                    | –         |                              |           |  |
|               | 286    | 0.026                    | 0.028     |                              |           |  |
|               | 289    | 0.010                    | –         |                              |           |  |
|               | 292    | 0.010                    | –         |                              |           |  |
|               | n      |                          | 194       | 71                           |           |  |
|               | 125    | 0.005                    | 0.014     |                              |           |  |
|               | 131    | 0.011                    | –         |                              |           |  |
|               | 137    | 0.005                    | –         |                              |           |  |
|               | 140    | 0.005                    | –         |                              |           |  |
|               | 143    | 0.043                    | 0.043     |                              |           |  |
|               | 146    | 0.027                    | 0.029     |                              |           |  |
| 149           | 0.054  | 0.043                    |           |                              |           |  |
| 152           | 0.267  | 0.257                    |           |                              |           |  |
| 155           | 0.155  | 0.129                    |           |                              |           |  |
| 158           | 0.107  | 0.071                    |           |                              |           |  |
| 161           | 0.091  | 0.071                    |           |                              |           |  |
| 164           | 0.043  | 0.057                    |           |                              |           |  |
| 167           | 0.043  | 0.071                    |           |                              |           |  |
| 170           | 0.032  | 0.014                    |           |                              |           |  |
| 173           | 0.043  | 0.071                    |           |                              |           |  |
| 176           | 0.037  | 0.071                    |           |                              |           |  |
| 179           | 0.011  | 0.014                    |           |                              |           |  |
| 185           | 0.011  | 0.014                    |           |                              |           |  |
| 188           | 0.005  | 0.014                    |           |                              |           |  |
| 191           | 0.005  | 0.014                    |           |                              |           |  |
| n             |        | 187                      | 70        |                              |           |  |
| ARA2          | 59     | 0.0812                   | 0.081     |                              |           |  |
|               | 62     | 0.066                    | 0.066     |                              |           |  |
|               | 65     | 0.3401                   | 0.340     |                              |           |  |
|               | 68     | 0.1929                   | 0.193     |                              |           |  |
|               | 71     | 0.1827                   | 0.183     |                              |           |  |
|               | 74     | 0.0863                   | 0.086     |                              |           |  |
|               | 77     | 0.0305                   | 0.031     |                              |           |  |
|               | 80     | 0.0203                   | 0.020     |                              |           |  |
|               | n      |                          | 197       | 74                           |           |  |
|               | PfG377 | 90                       | 0.025     | 0.014                        |           |  |
| 93            |        | 0.046                    | 0.081     |                              |           |  |
| 96            |        | 0.279                    | 0.311     |                              |           |  |

(continued)

SUPPLEMENTAL TABLE 3  
Continued

| Marker   | bp       | All infections (N = 200) | Dominant infections (N = 74) |
|----------|----------|--------------------------|------------------------------|
|          |          | Frequency                | Frequency                    |
| TA109    | 99       | 0.543                    | 0.500                        |
|          | 102      | 0.096                    | 0.081                        |
|          | 105      | 0.010                    | 0.014                        |
|          | <i>n</i> | 197                      | 74                           |
|          | 148      | 0.005                    | 0.014                        |
|          | 151      | 0.005                    | –                            |
|          | 154      | 0.010                    | –                            |
|          | 157      | 0.005                    | –                            |
|          | 160      | 0.172                    | 0.176                        |
|          | 163      | 0.192                    | 0.203                        |
|          | 166      | 0.015                    | 0.014                        |
|          | 169      | 0.015                    | 0.027                        |
|          | 172      | 0.182                    | 0.176                        |
|          | 175      | 0.237                    | 0.284                        |
|          | 178      | 0.015                    | –                            |
|          | 181      | 0.005                    | –                            |
|          | 184      | 0.056                    | 0.054                        |
|          | 187      | 0.010                    | 0.014                        |
|          | 190      | 0.005                    | –                            |
|          | 196      | 0.061                    | 0.041                        |
| 199      | 0.005    | –                        |                              |
| 208      | 0.005    | –                        |                              |
| <i>n</i> | 198      | 74                       |                              |
| TA87     | 75       | 0.010                    | –                            |
|          | 81       | 0.005                    | 0.014                        |
|          | 84       | 0.005                    | –                            |
|          | 87       | 0.005                    | –                            |
|          | 90       | 0.031                    | –                            |
|          | 93       | 0.062                    | 0.110                        |
|          | 96       | 0.150                    | 0.164                        |
|          | 99       | 0.171                    | 0.123                        |
|          | 102      | 0.218                    | 0.219                        |
|          | 105      | 0.140                    | 0.151                        |
|          | 108      | 0.098                    | 0.110                        |
|          | 111      | 0.067                    | 0.069                        |
|          | 114      | 0.005                    | 0.014                        |
|          | 117      | 0.010                    | 0.014                        |
|          | 120      | 0.010                    | –                            |
|          | 126      | 0.010                    | 0.014                        |
|          | <i>n</i> | 193                      | 73                           |
| TA42     | 179      | 0.006                    | –                            |
|          | 185      | 0.803                    | 0.779                        |
|          | 188      | 0.017                    | 0.029                        |
|          | 194      | 0.006                    | –                            |
|          | 197      | 0.140                    | 0.162                        |
|          | 200      | 0.006                    | –                            |
|          | 209      | 0.017                    | 0.029                        |
|          | 233      | 0.006                    | –                            |
|          | <i>n</i> | 178                      | 68                           |
| 2490     | 75       | 0.011                    | 0.014                        |
|          | 81       | 0.175                    | 0.143                        |
|          | 84       | 0.760                    | 0.743                        |
|          | 87       | 0.033                    | 0.071                        |
|          | 90       | 0.022                    | 0.029                        |
| <i>n</i> | 183      | 70                       |                              |
| TA81     | 103      | 0.005                    | –                            |
|          | 106      | 0.020                    | 0.055                        |
|          | 109      | 0.036                    | 0.027                        |
|          | 112      | 0.077                    | 0.069                        |
|          | 115      | 0.235                    | 0.233                        |
|          | 118      | 0.214                    | 0.164                        |
|          | 121      | 0.194                    | 0.192                        |
|          | 124      | 0.092                    | 0.110                        |

SUPPLEMENTAL TABLE 3  
Continued

| Marker   | bp       | All infections (N = 200) | Dominant infections (N = 74) |
|----------|----------|--------------------------|------------------------------|
|          |          | Frequency                | Frequency                    |
| PfPK2    | 127      | 0.097                    | 0.096                        |
|          | 130      | 0.026                    | 0.055                        |
|          | 136      | 0.005                    | –                            |
|          | <i>n</i> | 196                      | 73                           |
|          | 153      | 0.005                    | 0.014                        |
| 156      | 0.027    | 0.014                    |                              |
| 159      | 0.164    | 0.167                    |                              |
| 162      | 0.233    | 0.292                    |                              |
| 165      | 0.259    | 0.181                    |                              |
| 168      | 0.122    | 0.153                    |                              |
| 171      | 0.058    | 0.097                    |                              |
| 174      | 0.016    | –                        |                              |
| 177      | 0.032    | 0.014                    |                              |
| 180      | 0.042    | 0.028                    |                              |
| 183      | 0.016    | 0.014                    |                              |
| 186      | 0.005    | –                        |                              |
| 189      | 0.016    | 0.028                    |                              |
| 192      | 0.005    | –                        |                              |
| <i>n</i> | 189      | 72                       |                              |

(continued)

SUPPLEMENTAL TABLE 4  
Patterns of genetic diversity in Bongo District for dominant infections

| Population                | <i>n</i> | <i>h</i> | <i>A</i> ± SE | <i>R<sub>s</sub></i> ± SE | <i>H<sub>e</sub></i> ± SE |
|---------------------------|----------|----------|---------------|---------------------------|---------------------------|
| Vea/Gowrie catchment area | 42       | 42       | 8.67 ± 3.34   | 8.45 ± 3.24               | 0.76 ± 0.17               |
| Vea                       | 26       | 26       | 7.42 ± 2.81   | 6.14 ± 2.01               | 0.76 ± 0.13               |
| Gowrie                    | 16       | 16       | 5.75 ± 2.09   | 5.45 ± 1.94               | 0.72 ± 0.23               |
| Soe catchment area        | 32       | 32       | 8.00 ± 3.59   | 7.97 ± 3.58               | 0.75 ± 0.19               |
| Soe Sanabisi              | 10       | 10       | 5.08 ± 1.93   | 5.07 ± 1.92               | 0.72 ± 0.23               |
| Soe Boko                  | 22       | 22       | 7.08 ± 2.81   | 5.96 ± 2.09               | 0.74 ± 0.17               |
| Total                     | 74       | 74       | 10.50 ± 4.82  | 10.44 ± 4.78              | 0.76 ± 0.18               |

*A* = number of alleles per locus; *h* = number of haplotypes; *H<sub>e</sub>* = expected heterozygosity; *n* = number of isolates; *R<sub>s</sub>* = allelic richness estimate.

SUPPLEMENTAL TABLE 5  
Multilocus linkage disequilibrium in Bongo District for one marker/chromosome for 55 dominant infections with no missing data.

| chr5 | chr6  | chr10 | chr12  | <i>I<sub>A</sub><sup>S</sup></i> ( <i>P</i> value) |
|------|-------|-------|--------|----------------------------------------------------|
| TA42 | TA109 | TA40  | PFG377 | 0.0120 (0.066)                                     |
| TA42 | TA109 | 2490  | PFG377 | 0.0105 (0.145)                                     |
| TA42 | TA109 | TA40  | PfPK2  | 0.0083 (0.127)                                     |
| TA42 | TA109 | 2490  | PfPK2  | 0.0062 (0.254)                                     |
| TA42 | TA87  | TA40  | PFG377 | 0.0106 (0.091)                                     |
| TA42 | TA87  | 2490  | PFG377 | 0.0077 (0.209)                                     |
| TA42 | TA87  | TA40  | PfPK2  | 0.0088 (0.108)                                     |
| TA42 | TA87  | 2490  | PfPK2  | 0.0050 (0.288)                                     |
| TA42 | TA1   | TA40  | PFG377 | 0.0168 (0.022)*                                    |
| TA42 | TA1   | 2490  | PFG377 | 0.0166 (0.055)                                     |
| TA42 | TA1   | TA40  | PfPK2  | 0.0151 (0.028)*                                    |
| TA42 | TA1   | 2490  | PfPK2  | 0.0141 (0.070)                                     |
| TA81 | TA109 | TA40  | PFG377 | 0.0046 (0.230)                                     |
| TA81 | TA109 | 2490  | PFG377 | 0.0097 (0.103)                                     |
| TA81 | TA109 | TA40  | PfPK2  | 0.0030 (0.312)                                     |
| TA81 | TA109 | 2490  | PfPK2  | 0.0077 (0.138)                                     |
| TA81 | TA87  | TA40  | PFG377 | 0.0028 (0.311)                                     |
| TA81 | TA87  | 2490  | PFG377 | 0.0066 (0.178)                                     |
| TA81 | TA87  | TA40  | PfPK2  | 0.0036 (0.276)                                     |
| TA81 | TA87  | 2490  | PfPK2  | 0.0066 (0.171)                                     |
| TA81 | TA1   | TA40  | PFG377 | 0.0034 (0.294)                                     |
| TA81 | TA1   | 2490  | PFG377 | 0.0112 (0.074)                                     |
| TA81 | TA1   | TA40  | PfPK2  | 0.0037 (0.272)                                     |
| TA81 | TA1   | 2490  | PfPK2  | 0.0111 (0.061)                                     |

\* *P* < 0.05
